# Supplementary material for: Proton-conductive aromatic membranes reinforced with poly(vinylidene fluoride) nanofibers for high-performance durable fuel cells
Source: PubMed Central journal article supplement — Sci Adv. 2023 Jul 26;9(30):eadg9057. doi: 10.1126/sciadv.adg9057 (PMC10371013; doi:10.1126/sciadv.adg9057), 2023-07-26
Supplement: sciadv.adg9057_sm.pdf [file sciadv.adg9057_sm.pdf]

Supplementary Materials for  
**Proton-conductive aromatic membranes reinforced with  
poly(vinylidene fluoride) nanofibers for high-performance durable fuel cells**

Fanghua Liu *et al.*

Corresponding author: Kenji Miyatake, [miyatake@yamanashi.ac.jp](mailto:miyatake@yamanashi.ac.jp)

*Sci. Adv.* **9**, eadg9057 (2023)  
DOI: 10.1126/sciadv.adg9057

**This PDF file includes:**

Figs. S1 to S17  
Tables S1 to S5

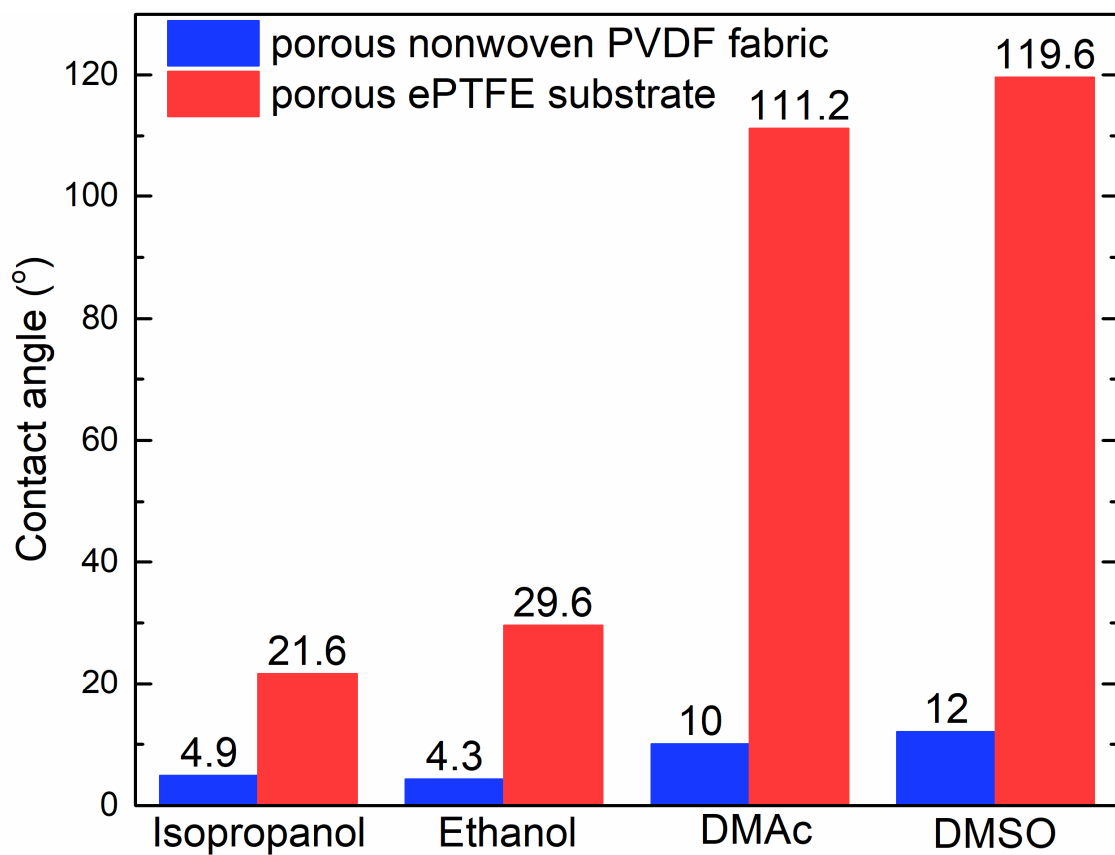

**Fig. S1.** Contact angles of different solvents on the porous nonwoven PVDF fabric and porous ePTFE substrate at room temperature.

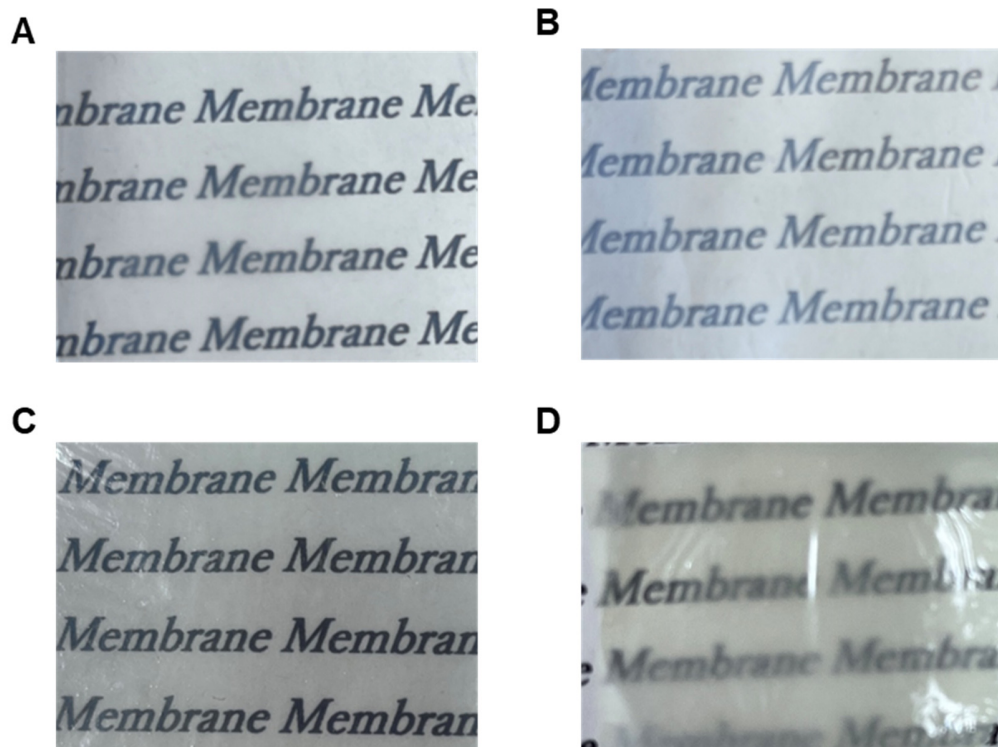

**Fig. S2. Images of the reinforcement materials and reinforced membranes. (A)** Porous nonwoven PVDF nanofiber fabric. **(B)** Porous ePTFE substrate. **(C)** Reinforced SPP-TFP-4.0-PVDF membrane. **(D)** Reinforced SPP-TFP-4.0-ePTFE membrane.

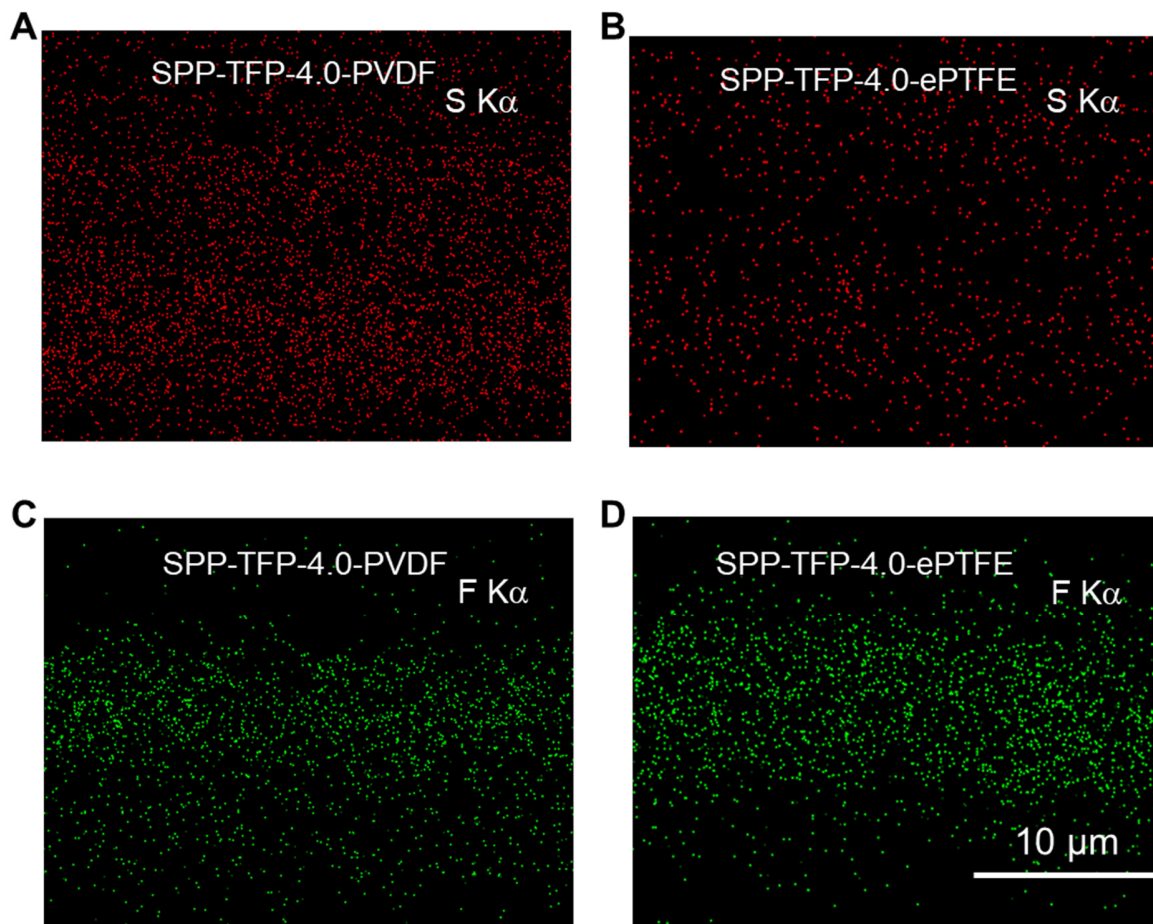

**Fig. S3. Elemental mapping images of the reinforced membranes.** (A) and (B) Sulfur element. (C) and (D) Fluorine element. Analyzed by EDS (energy-dispersive X-ray spectroscopy) at acceleration voltage of 15.0 kV.

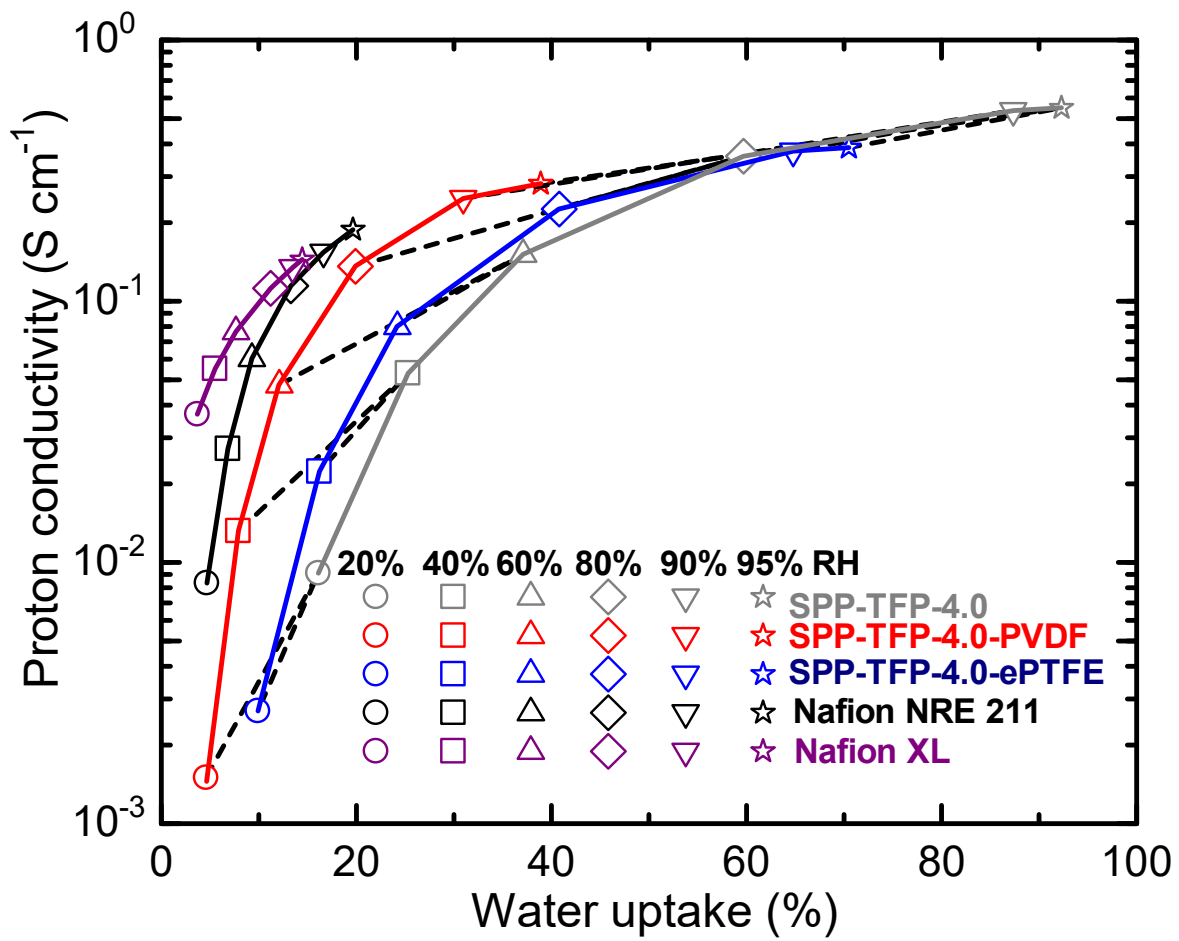

Fig. S4. Dependence of the proton conductivity on the water uptake from 20% to 95% RH at 80 °C.

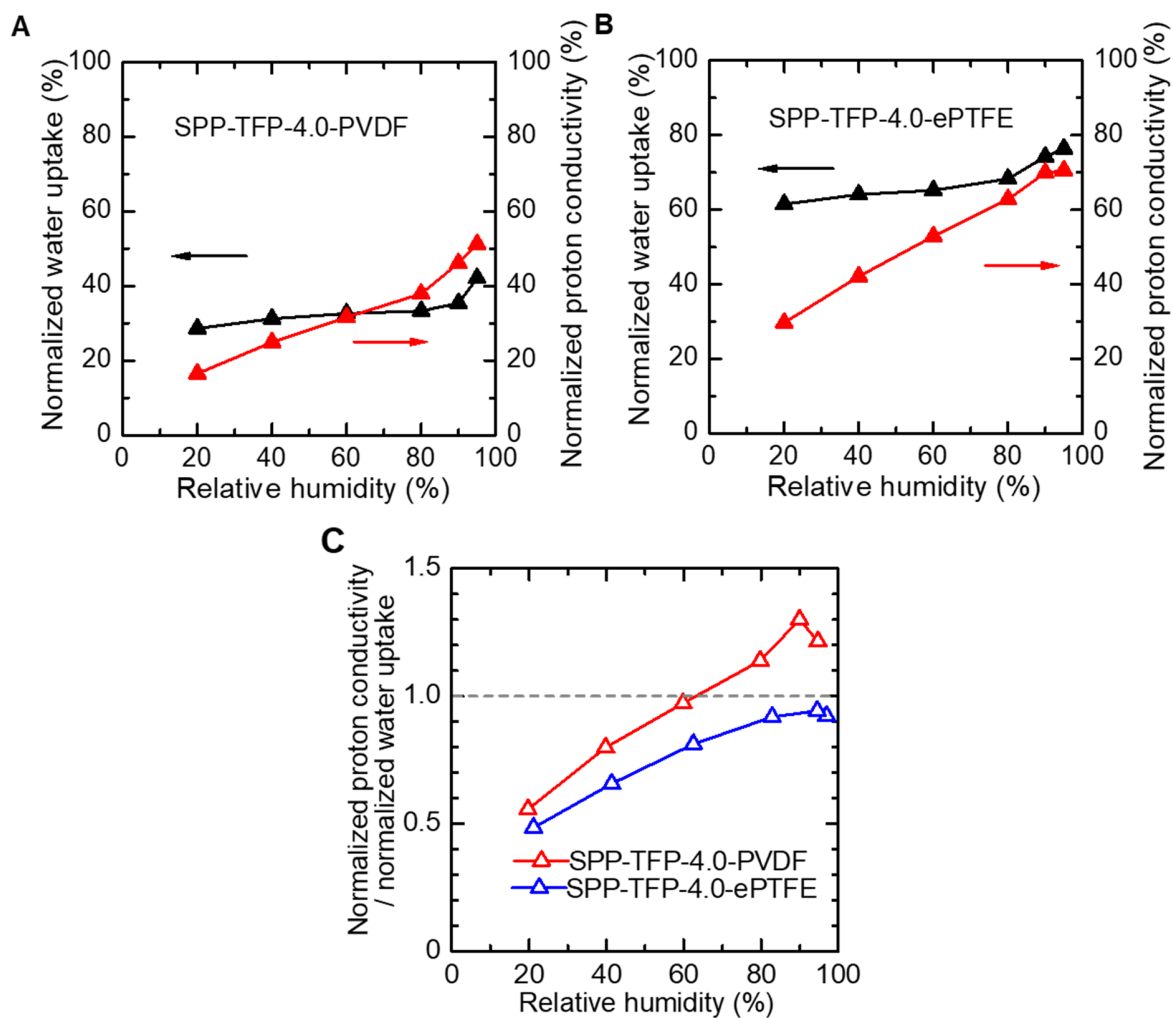

**Fig. S5.** The normalized water uptake and proton conductivity of reinforced membranes relative to their parent SPP-TFP-4.0 membrane under different relative humidity at 80 °C. (A) SPP-TFP-4.0-PVDF. (B) SPP-TFP-4.0-ePTFE. (C) Normalized proton conductivity divided by normalized water uptake as a function of relative humidity for SPP-TFP-4.0-PVDF and SPP-TFP-4.0-ePTFE.

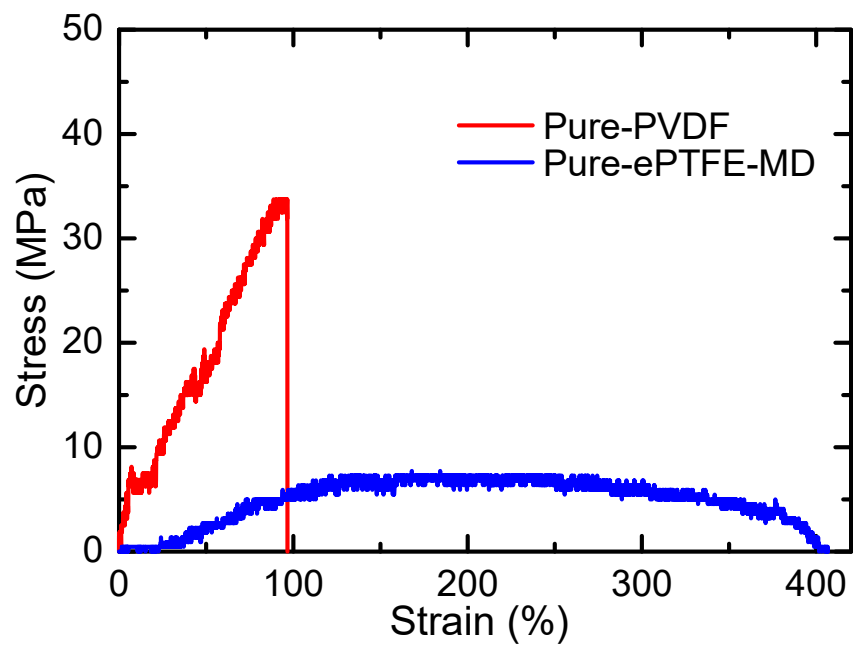

**Fig. S6. Stress-strain curves of porous ePTFE substrate in machine direction (MD) and nonwoven PVDF fabric at 80 °C and 60% RH.**

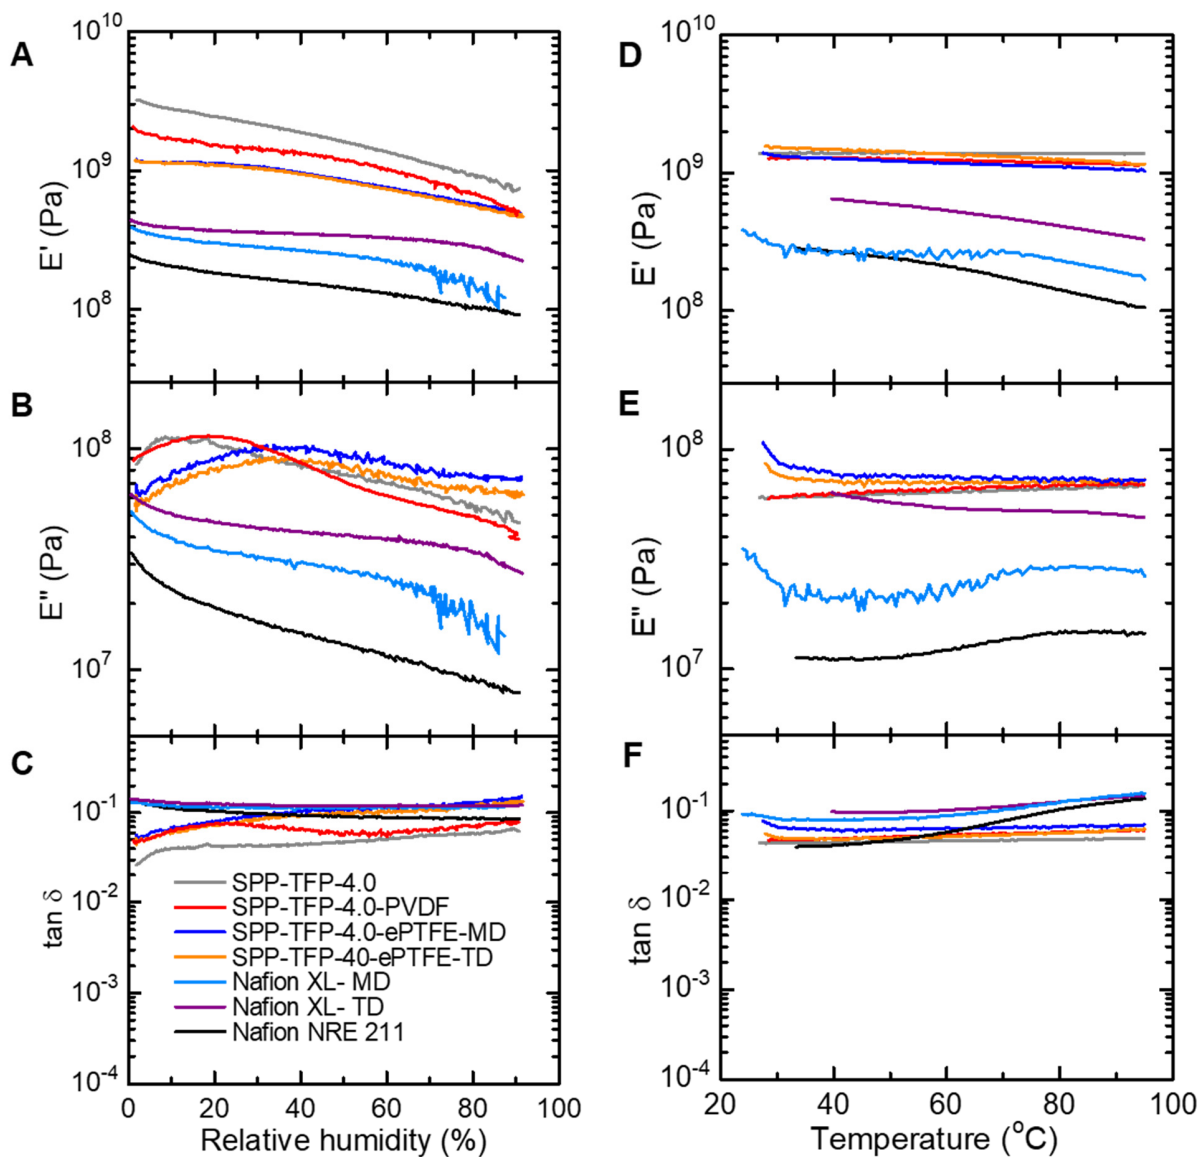

**Fig. S7.** The viscoelastic properties of SPP-TFP-4.0-ePTFE and Nafion XL in different directions, SPP-TFP-4.0-PVDF, parent SPP-TFP-4.0 and Nafion NRE 211. At 80 °C, relative humidity dependence of Storage modulus ( $E'$ ) (A), loss modulus ( $E''$ ) (B) and  $\tan \delta$  ( $=E''/E'$ ) (C). At 60% RH, temperature dependence of Storage modulus ( $E'$ ) (D), loss modulus ( $E''$ ) (E) and  $\tan \delta$  ( $=E''/E'$ ) (F).



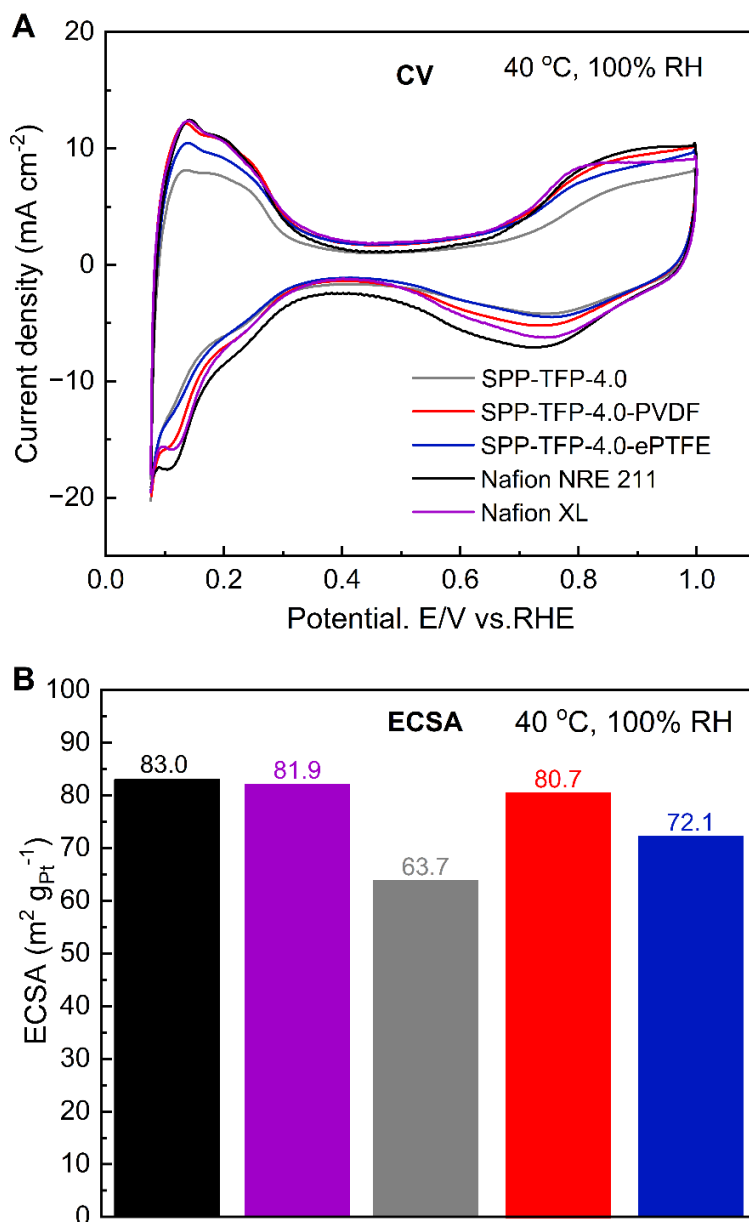

**Fig. S8. CV curves with corresponding ECSA at 40 °C and 100% RH. (A) CV curves. (B) Calculated ECSA values from CV curves. The CV was obtained by sweeping the potential from 0.075 to 1.0 V vs. RHE (reversible hydrogen electrode) at a scan rate of 20 mV s<sup>-1</sup> for 50 cycles, supplying hydrogen (0.1 slpm) and nitrogen (0.1 slpm) to the anode and cathode, respectively, with no back pressure. The catalyst loading was 0.5 mg cm<sup>-2</sup> for all electrodes.**

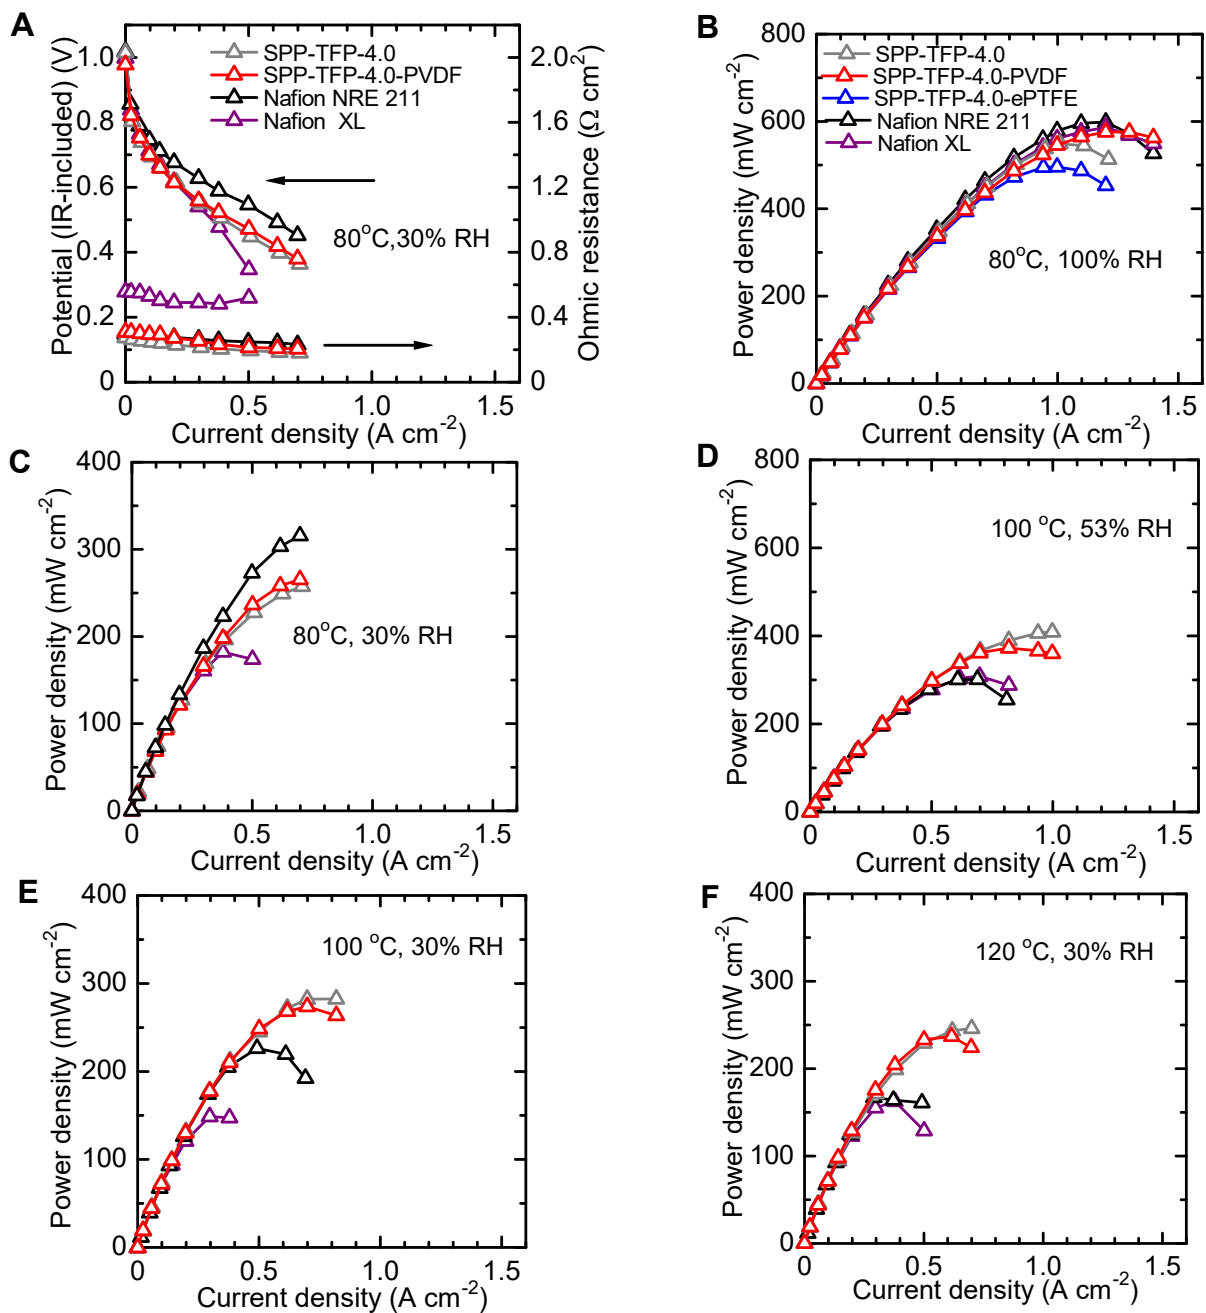

**Fig. S9. Fuel cell performance.** IR curves at 80 °C and 30% RH (A). Power density as a function of the current density at 80 °C and 100% RH (B), 80 °C and 30% RH (C), 100 °C and 53% RH (D), 100 °C and 30% RH (E), and 120 °C and 30% RH (F). The catalyst loading was  $0.5 \text{ mg cm}^{-2}$  for both electrodes supplying hydrogen and air to the anode and cathode, respectively, with no back pressure.

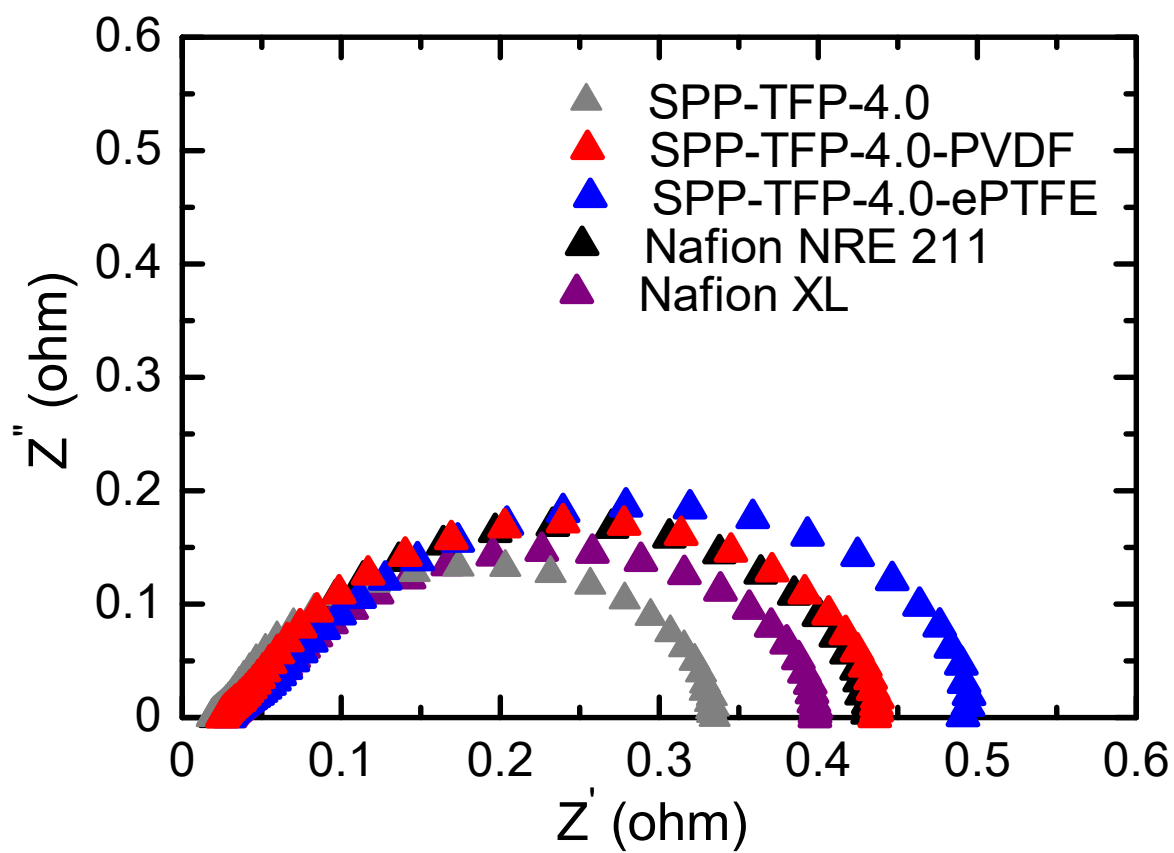

**Fig. S10.** Nyquist plots at 80 °C and 100% RH, feeding hydrogen (0.1 slpm) to the anode and air (0.1 slpm) to the cathode with no back pressure.

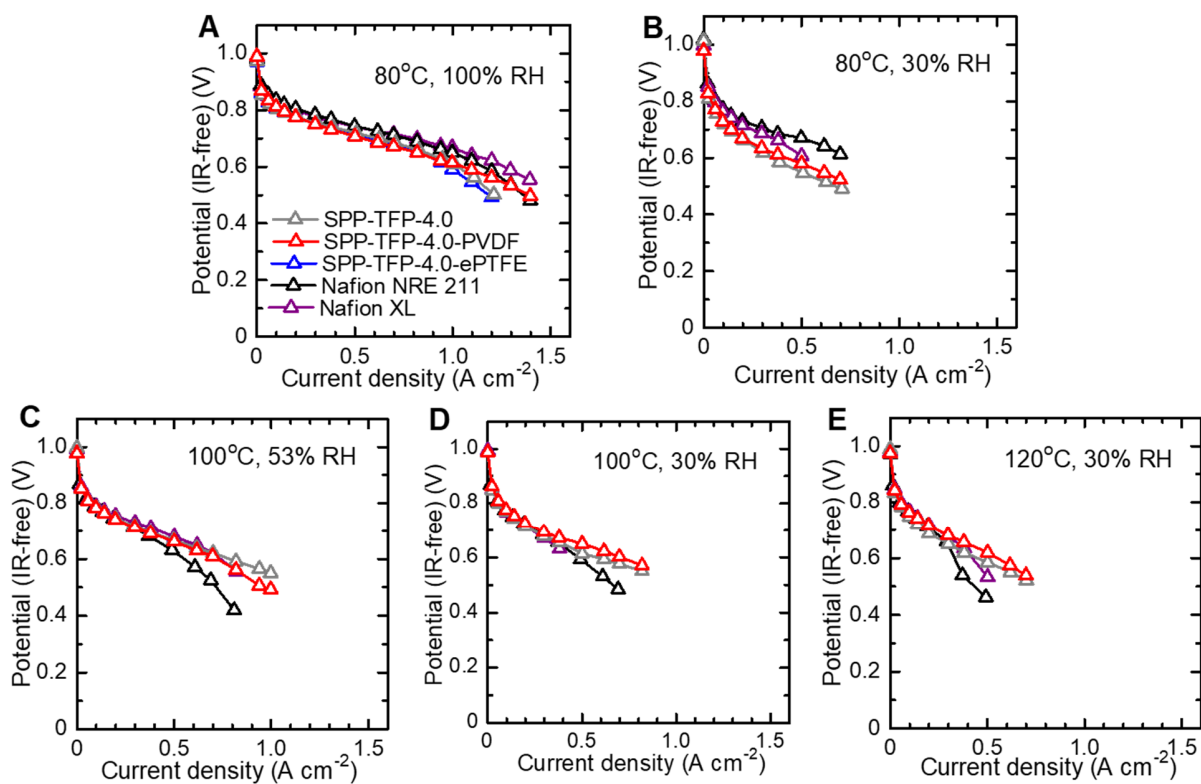

**Fig. S11. IR-corrected polarization curves.** (A) 80 °C and 100% RH, (B) 80 °C and 30% RH, (C) 100 °C and 53% RH (D) 100 °C and 30% RH and (E) 120 °C and 30% RH. The catalyst loading was 0.5 mg cm<sup>-2</sup> for all electrodes supplying hydrogen and air to the anode and cathode, respectively, with no back pressure.

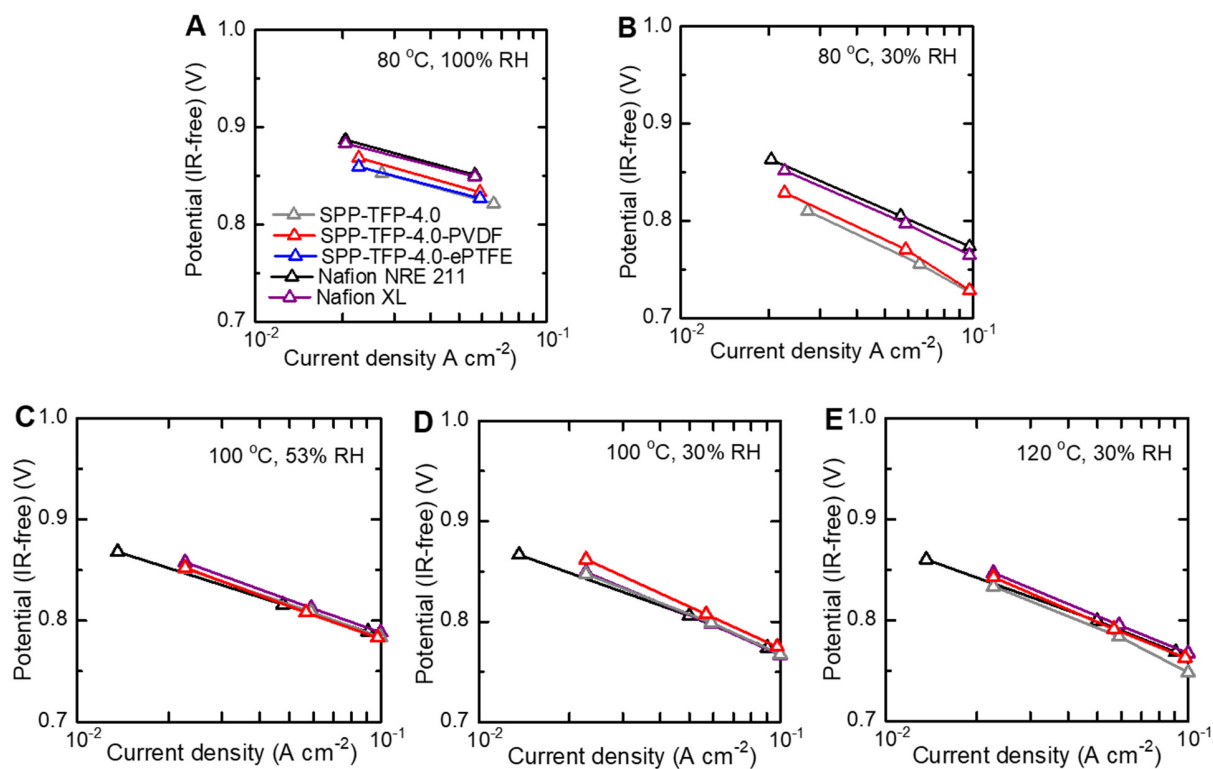

**Fig. S12. Tafel curves.** (A) 80 °C and 100% RH, (B) 80 °C and 30% RH, (C) 100 °C and 53% RH (D) 100 °C and 30% RH and (E) 120 °C and 30% RH. The catalyst loading was 0.5 mg cm<sup>-2</sup> for all electrodes, supplying hydrogen and air to the anode and cathode, respectively, with no backpressure.

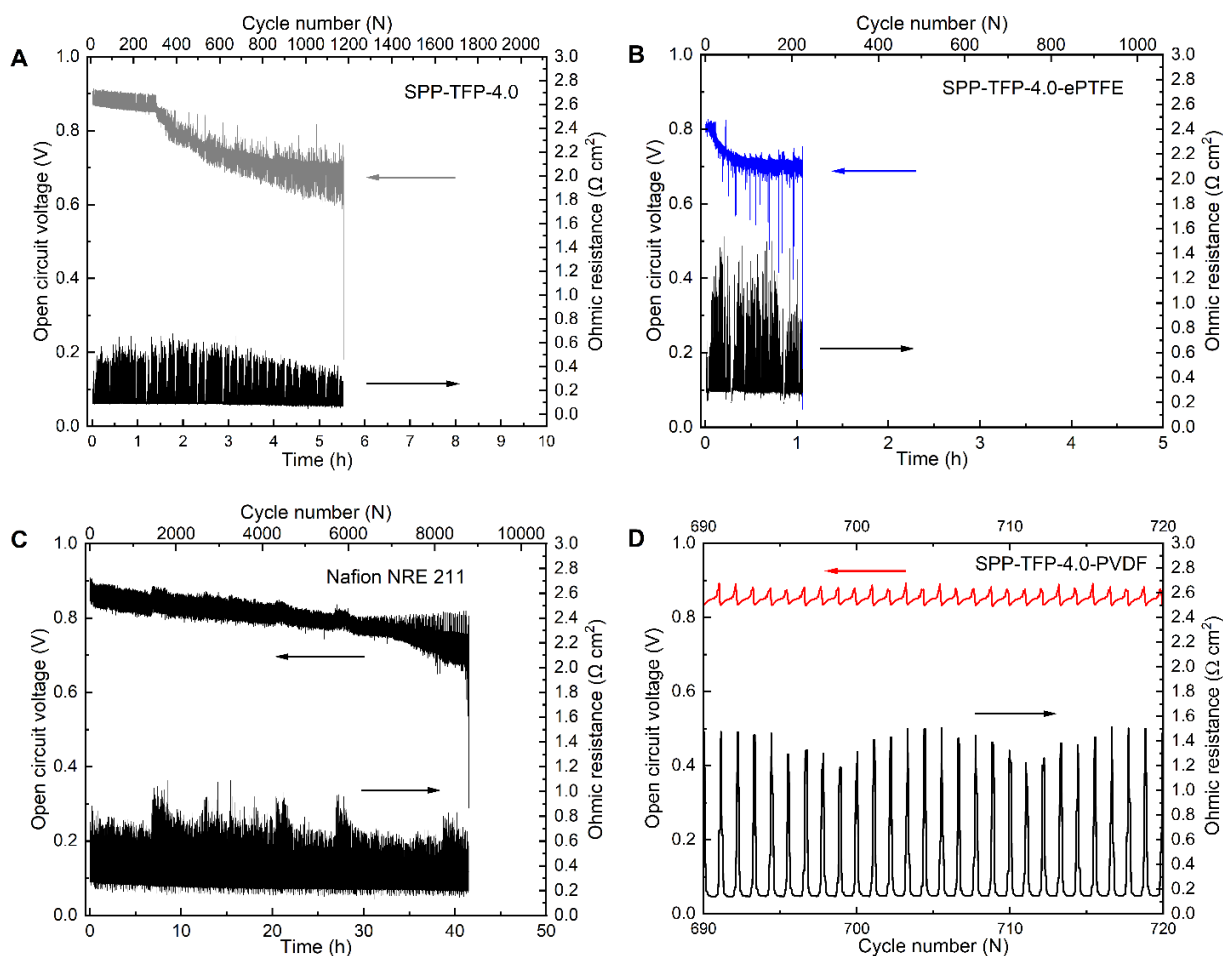

**Fig. S13. Combined chemical (OCV hold) and mechanical (wet/dry cycling) durability at 90 °C without back pressure.** The testing time and cycle number dependence of the OCV and ohmic resistance of SPP-TFP-4.0 (A), SPP-TFP-4.0-ePTFE (B) and Nafion NRE 211 (C). (D) Changes in OCV and ohmic resistance in each hydration regime for SPP-TFP-4.0-PVDF membrane. The tested cell loaded 0.2 and 0.1 mgPt cm<sup>-2</sup> at the anode (hydrogen, 0.06 slpm) and cathode (air, 0.06 slpm), respectively. The measurement was carried out at OCV, where the frequent wet/dry cycling was conducted via switching wet gas (100% RH; 15 s) and dry gas (0% RH; 2 s).

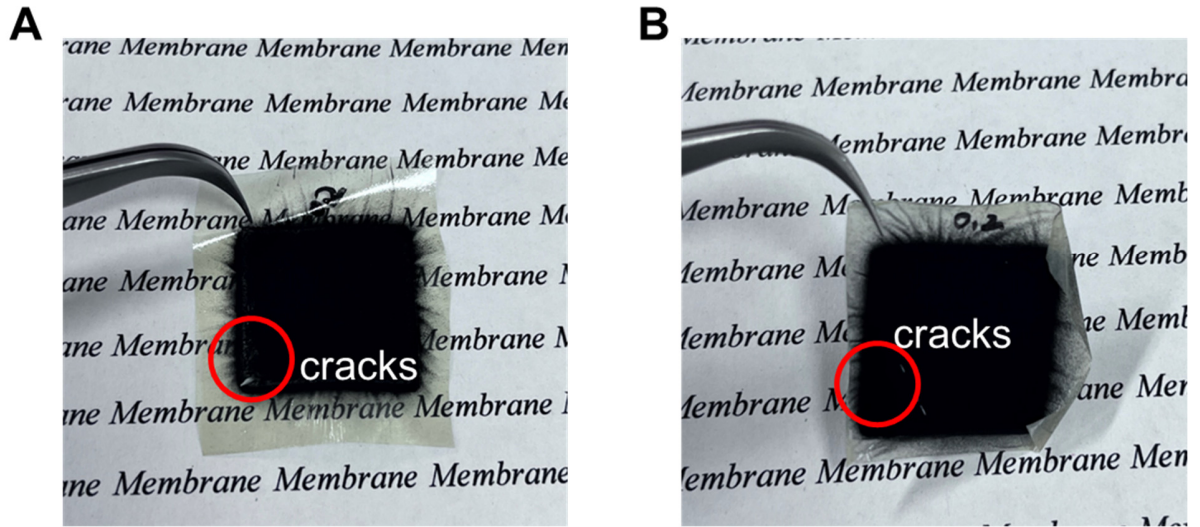

**Fig. S14.** The CCMs images after combined chemical and mechanical durability test. **(A)** SPP-TFP-4.0. **(B)** SPP-TFP-4.0-ePTFE.

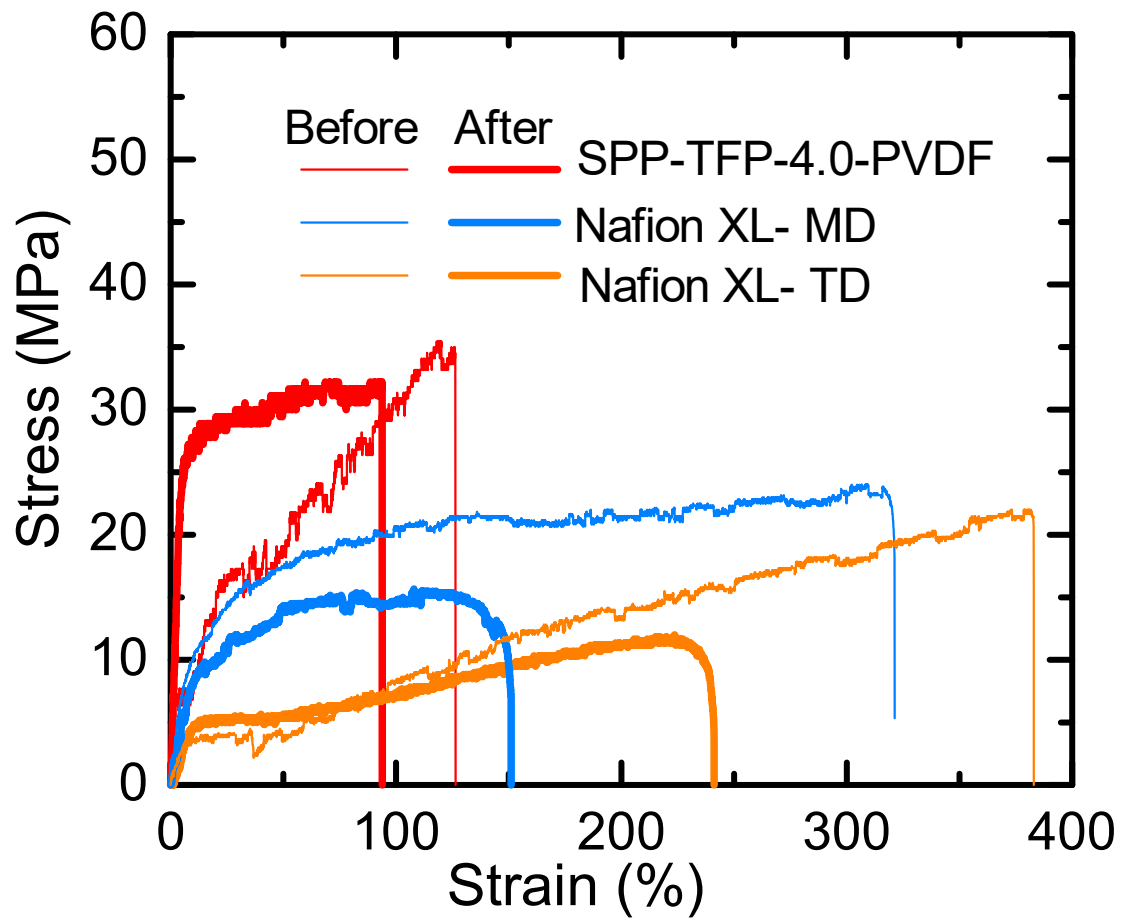

Fig. S15. The mechanical properties of SPP-TFP-4.0-PVDF and Nafion XL before and after combined chemical and mechanical durability test at 80 °C and 60% RH.



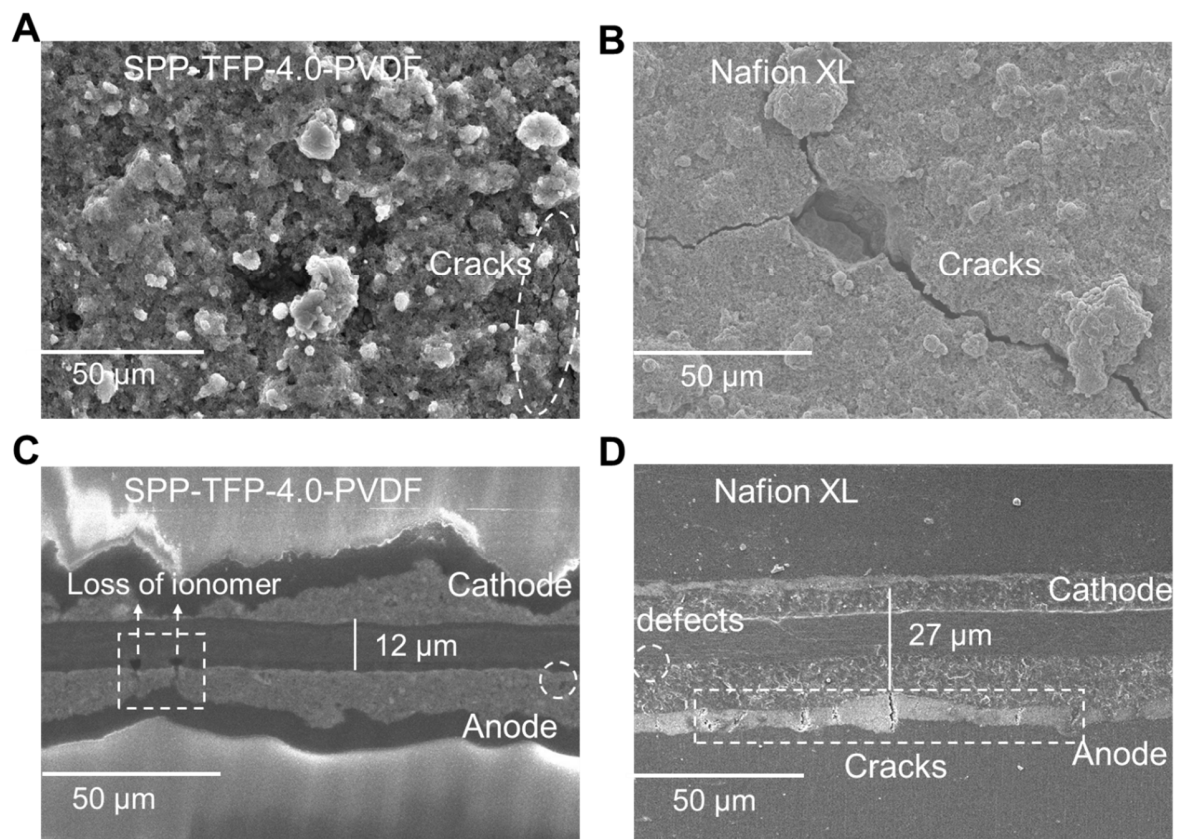

**Fig. S16. The SEM images of SPP-TFP-4.0-PVDF and Nafion XL after combined chemical and mechanical durability test. (A) and (B) Surface. (C) and (D) Cross-section. A Hitachi SU3500 device was used at an accelerating voltage of 15.0 kV.**

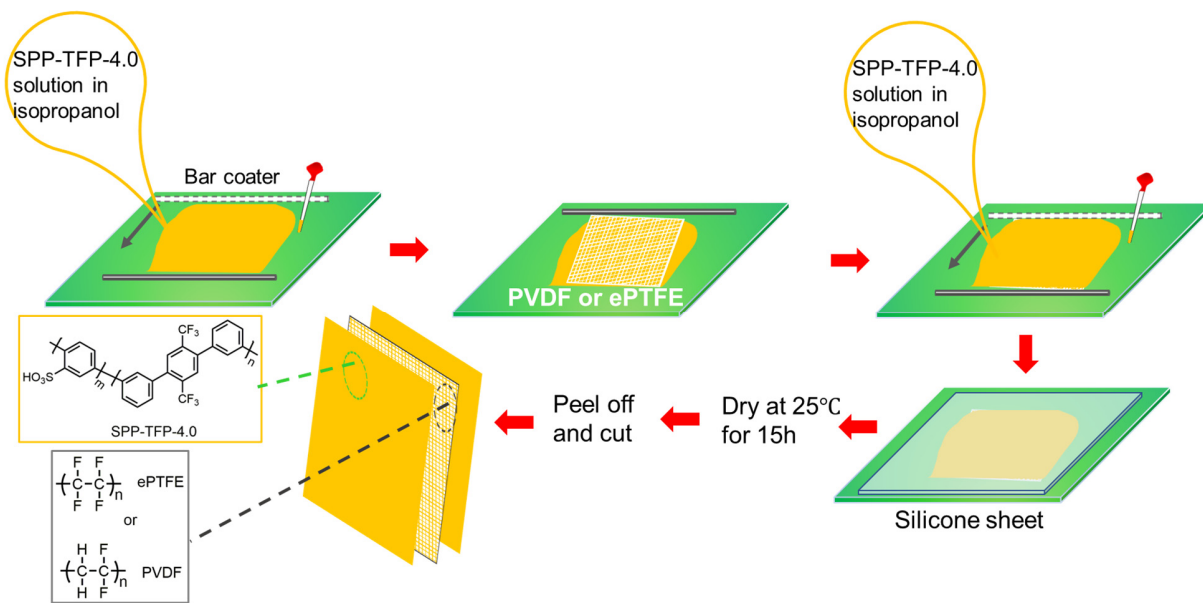

**Fig. S17. Preparation process for the reinforced membranes using the push-coating method.**

**Table S1.** The titrated IEC, hydrophilic and hydrophobic domain sizes, thickness, water uptake and swelling ratio of membranes.

| Membrane          | IEC<br>(mmol g <sup>-1</sup> ) |                  | Domain size (nm) |                 | Thickness<br>( $\mu$ m) | Water uptake <sup>c</sup> (%) |           | Swelling <sup>d</sup> at r.t.<br>(%) |                   |
|-------------------|--------------------------------|------------------|------------------|-----------------|-------------------------|-------------------------------|-----------|--------------------------------------|-------------------|
|                   | IEC <sup>a</sup>               | IEC <sup>b</sup> | hydrophilic      | hydrophobic     |                         | 20%<br>RH                     | 95%<br>RH | In-<br>plane                         | Through<br>-plane |
|                   |                                |                  |                  |                 |                         |                               |           |                                      |                   |
| SPP-TFP-4.0       | --                             | 3.40             | 2.50 $\pm$ 0.30  | 1.84 $\pm$ 0.15 | 27                      | 16.1                          | 92.3      | 19.9                                 | 46.6              |
| SPP-TFP-4.0-PVDF  | 2.96                           | 2.01             | 1.11 $\pm$ 0.24  | 1.93 $\pm$ 0.27 | 14                      | 4.6                           | 38.9      | 5.1                                  | 6.3               |
| SPP-TFP-4.0-ePTFE | 2.95                           | 2.13             | 1.74 $\pm$ 0.33  | 1.70 $\pm$ 0.20 | 16                      | 9.9                           | 70.5      | 13.5                                 | 14.3              |
| Nafion NRE 211    | --                             | 0.97             | --               | --              | 25                      | 4.7                           | 19.7      | 8.5                                  | 12.0              |
| Nafion XL         | --                             | 0.71             | --               | --              | 30                      | 3.7                           | 14.4      | 4.3                                  | 6.6               |

<sup>a</sup>: calculated from SEM images;

<sup>b</sup>: titrated IEC obtained by acid-base titration;

<sup>c</sup>: measured at 80 °C;

<sup>d</sup>: measured at r.t. (room temperature) in water.

**Table S2.** The obtained hydrogen permeability from LSV curves, and the calculated hydrogen permeability of the membranes considering the thickness and the proton conductivity at 80 °C and 100% RH.

| Membrane          | Thickness <sup>a</sup><br>( $\mu\text{m}$ ) | Hydrogen<br>permeability <sup>b</sup><br>( $\text{mA cm}^{-2}$ ) | Hydrogen permeability <sup>c</sup><br>( $10^9 \text{ mmol H}_2 \text{ s}^{-1} \text{ cm}^{-2} \text{ cm}$ ) | Proton<br>conductivity <sup>d</sup><br>( $\text{mS cm}^{-1}$ ) |
|-------------------|---------------------------------------------|------------------------------------------------------------------|-------------------------------------------------------------------------------------------------------------|----------------------------------------------------------------|
| SPP-TFP-4.0       | 27                                          | 0.90                                                             | 6.3                                                                                                         | 550.1                                                          |
| SPP-TFP-4.0-PVDF  | 14                                          | 1.06                                                             | 3.8                                                                                                         | 281.8                                                          |
| SPP-TFP-4.0-ePTFE | 16                                          | 1.15                                                             | 4.8                                                                                                         | 387.5                                                          |
| Nafion NRE 211    | 25                                          | 1.27                                                             | 8.2                                                                                                         | 187.9                                                          |
| Nafion XL         | 30                                          | 1.07                                                             | 8.3                                                                                                         | 139.5                                                          |

<sup>a</sup>: measured by micrometer.

<sup>b</sup>: obtained from LSV curves at 80 °C and 100% RH;

<sup>c</sup>: calculated by considering the thickness of membrane;

<sup>d</sup>: measured at 80 °C and 95% RH.

**Table S3.** The test conditions and results for combined chemical and mechanical durability.

| Membrane          | wet/<br>dry<br>time<br>(s) | Pt loading at<br>anode/cathode<br>(mg cm <sup>-2</sup> ) | OCV under wet/dry<br>state (V) |           | Ohmic<br>resistance<br>under wet/dry<br>state (mΩ cm <sup>2</sup> ) | Test<br>time<br>(h) | Cycle<br>number<br>(N) |
|-------------------|----------------------------|----------------------------------------------------------|--------------------------------|-----------|---------------------------------------------------------------------|---------------------|------------------------|
|                   |                            |                                                          | Initial                        | final     |                                                                     |                     |                        |
| SPP-TFP-4.0       | 15/2                       | 0.2/0.1                                                  | 0.91/0.87                      | 0.72/0.60 | 0.092/0.361                                                         | 5.5                 | 1,173                  |
| SPP-TFP-4.0-PVDF  | 15/2                       | 0.2/0.1                                                  | 0.91/0.86                      | 0.72/0.64 | 0.147/1.288                                                         | 703.0               | 148,870                |
| SPP-TFP-4.0-ePTFE | 15/2                       | 0.2/0.1                                                  | 0.82/0.79                      | 0.72/0.68 | 0.282/0.892                                                         | 1.1                 | 233                    |
| Nafion NRE 211    | 15/2                       | 0.2/0.1                                                  | 0.91/0.86                      | 0.76/0.61 | 0.271/0.755                                                         | 41.5                | 8,788                  |
| Nafion XL         | 15/2                       | 0.2/0.1                                                  | 0.91/0.86                      | 0.86/0.31 | 0.241/0.613                                                         | 415.6               | 88,008                 |

**Table S4.** The mechanical properties of SPP-TFP-4.0-PVDF and Nafion XL at 80 °C and 60% RH before and after combined chemical and mechanical durability test.

| Membrane         | Yield stress |       | Maximum    |       | Young's       |       | Rupture energy        |       |
|------------------|--------------|-------|------------|-------|---------------|-------|-----------------------|-------|
|                  | (MPa)        |       | strain (%) |       | modulus (GPa) |       | (MJ m <sup>-3</sup> ) |       |
|                  | Before       | After | Before     | After | Before        | After | Before                | After |
| SPP-TFP-4.0-PVDF | 35.5         | 32.2  | 126.4      | 94.0  | 0.50          | 0.55  | 28.1                  | 27.4  |
| Nafion XL-MD     | 24.0         | 15.7  | 321.2      | 151.1 | 0.16          | 0.08  | 64.3                  | 19.5  |
| Nafion XL-TD     | 22.0         | 12.0  | 383.0      | 241.2 | 0.06          | 0.05  | 48.8                  | 19.3  |

**Table S5.** The physical parameters of porous substrates.

| Substrate | Porosity (%) | Pore size ( $\mu\text{m}$ ) | Fiber diameter (nm) | Thickness ( $\mu\text{m}$ ) | Source             |
|-----------|--------------|-----------------------------|---------------------|-----------------------------|--------------------|
| PVDF      | 78           | 0.2857                      | 100                 | 7                           | Shinshu University |
| ePTFE     | 85           | 0.4~0.7                     | -                   | 11                          | Valqua LTD         |
